## Expression of Concern

# Expression of Concern: Association of $\text{Fc}\epsilon\text{RI}\beta$ polymorphisms with risk of asthma and allergic rhinitis: Evidence based on 29 case–control studies

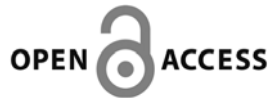

The Editorial Office has been made aware of potential issues surrounding the scientific validity of this paper, as commented on in the correspondence “Comments on ‘Association of  $\text{Fc}\epsilon\text{RI}\beta$  polymorphisms with risk of asthma and allergic rhinitis: evidence based on 29 case–control studies””, and therefore has issued an expression of concern to notify readers to potential errors in the conclusions. The authors were invited to respond to the comments made, but have not responded.

Downloaded from [http://port.silverchair.com/bioscierep/article-pdf/40/7/BSR-20180177\\_EOC/888664/bsr-2018-0177-eoc.pdf](http://port.silverchair.com/bioscierep/article-pdf/40/7/BSR-20180177_EOC/888664/bsr-2018-0177-eoc.pdf) by guest on 24 April 2024

Version of Record published:  
 22 July 2020
